# Supplementary material for: Cytotype distribution and chloroplast phylogeography of the Actinidia chinensis complex
Source: PubMed Central journal article supplement (PMC8259359; doi:10.1186/s12870-021-03099-y), 2021-07-06
Supplement: 12870_2021_3099_MOESM1_ESM.pdf [file 12870_2021_3099_MOESM1_ESM.pdf]

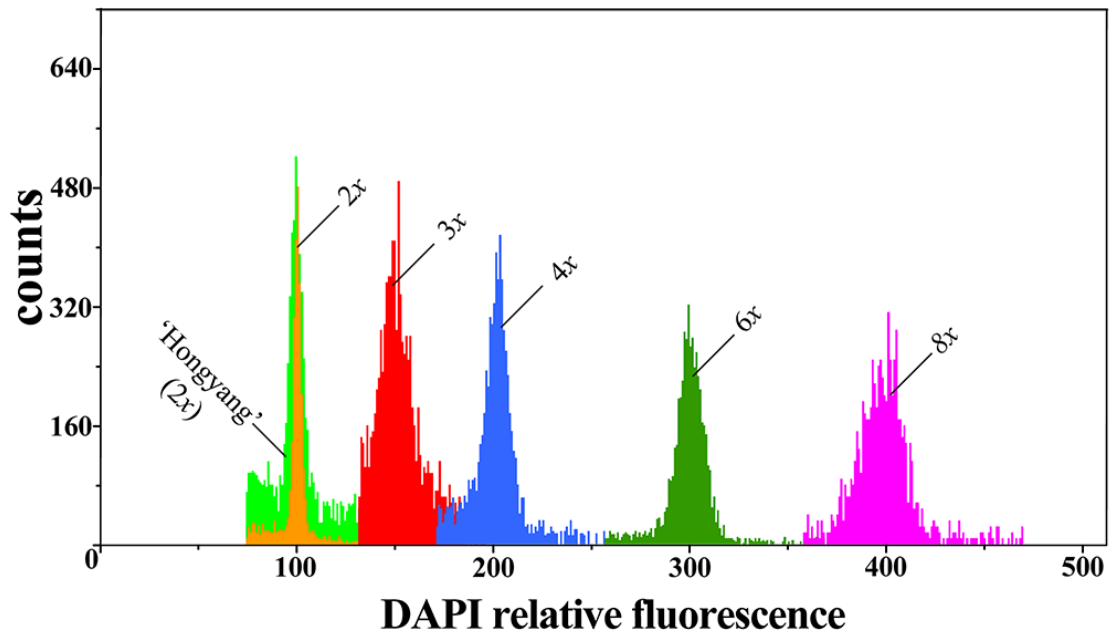

**Figure S1** Schematic diagram of flow cytometric histogram of DAPI-stained nuclei of six type of ploidy levels (2x, 3x, 4x, 6x, and 8x) of the *A. chinensis* complex analyzed simultaneously with the internal standard *Actinidia chinensis* cv. 'Hongyang'.

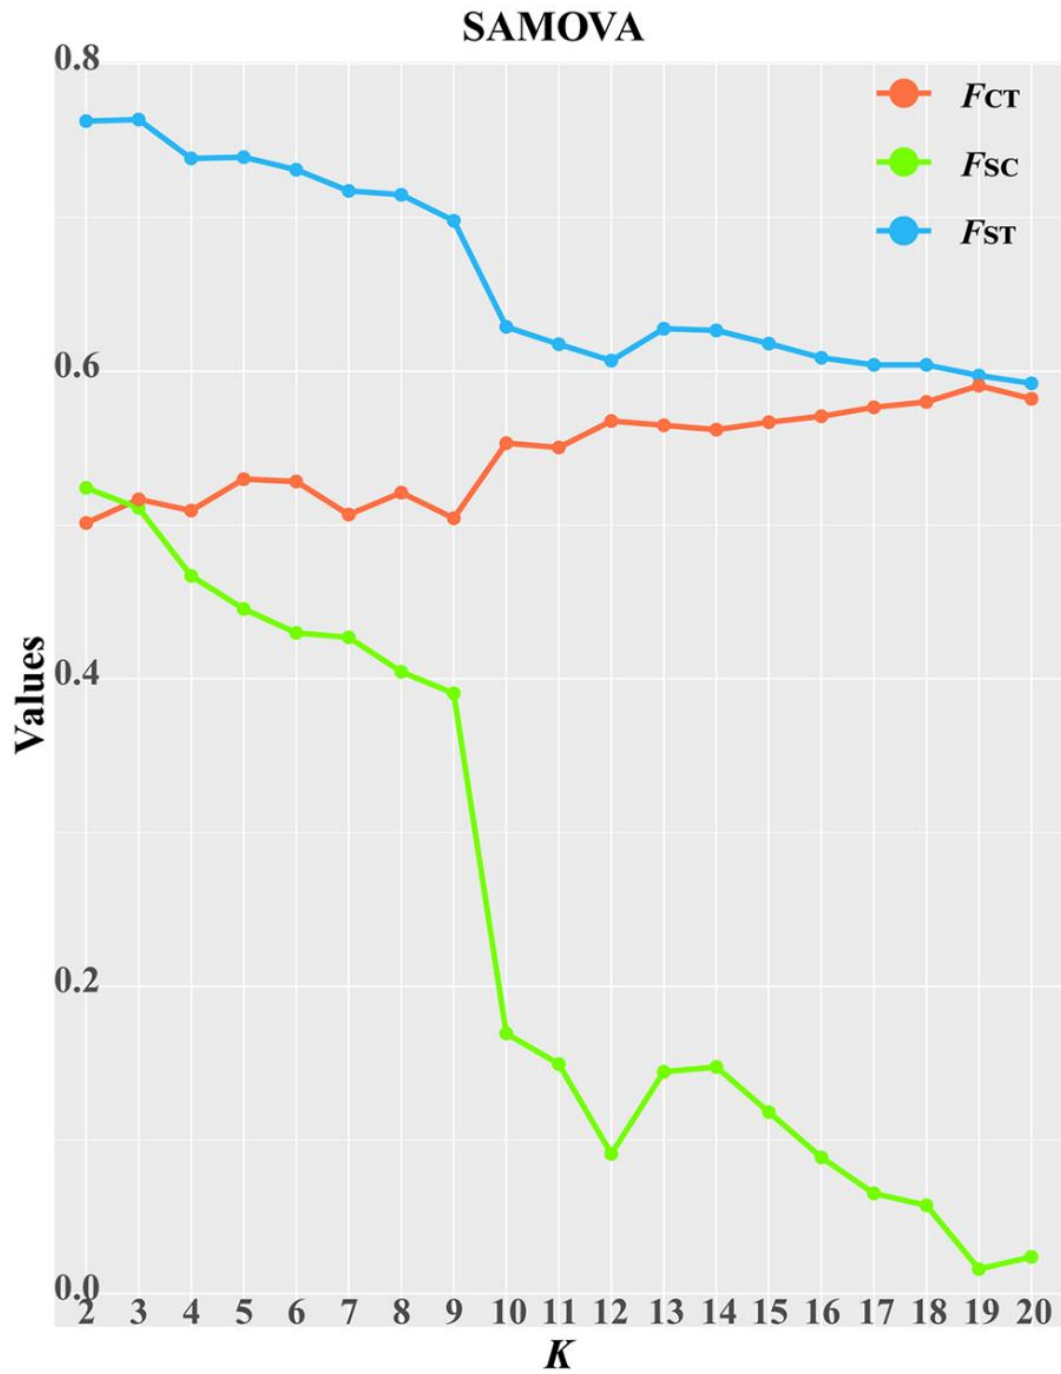

**Figure S2** Results of spatial analysis of molecular variance analysis (SAMOVA,  $K = 2-20$ ) on the *A. chinensis* complex populations in subtropical China.  $K$  refers to the number of predefined groups used in the analyses.

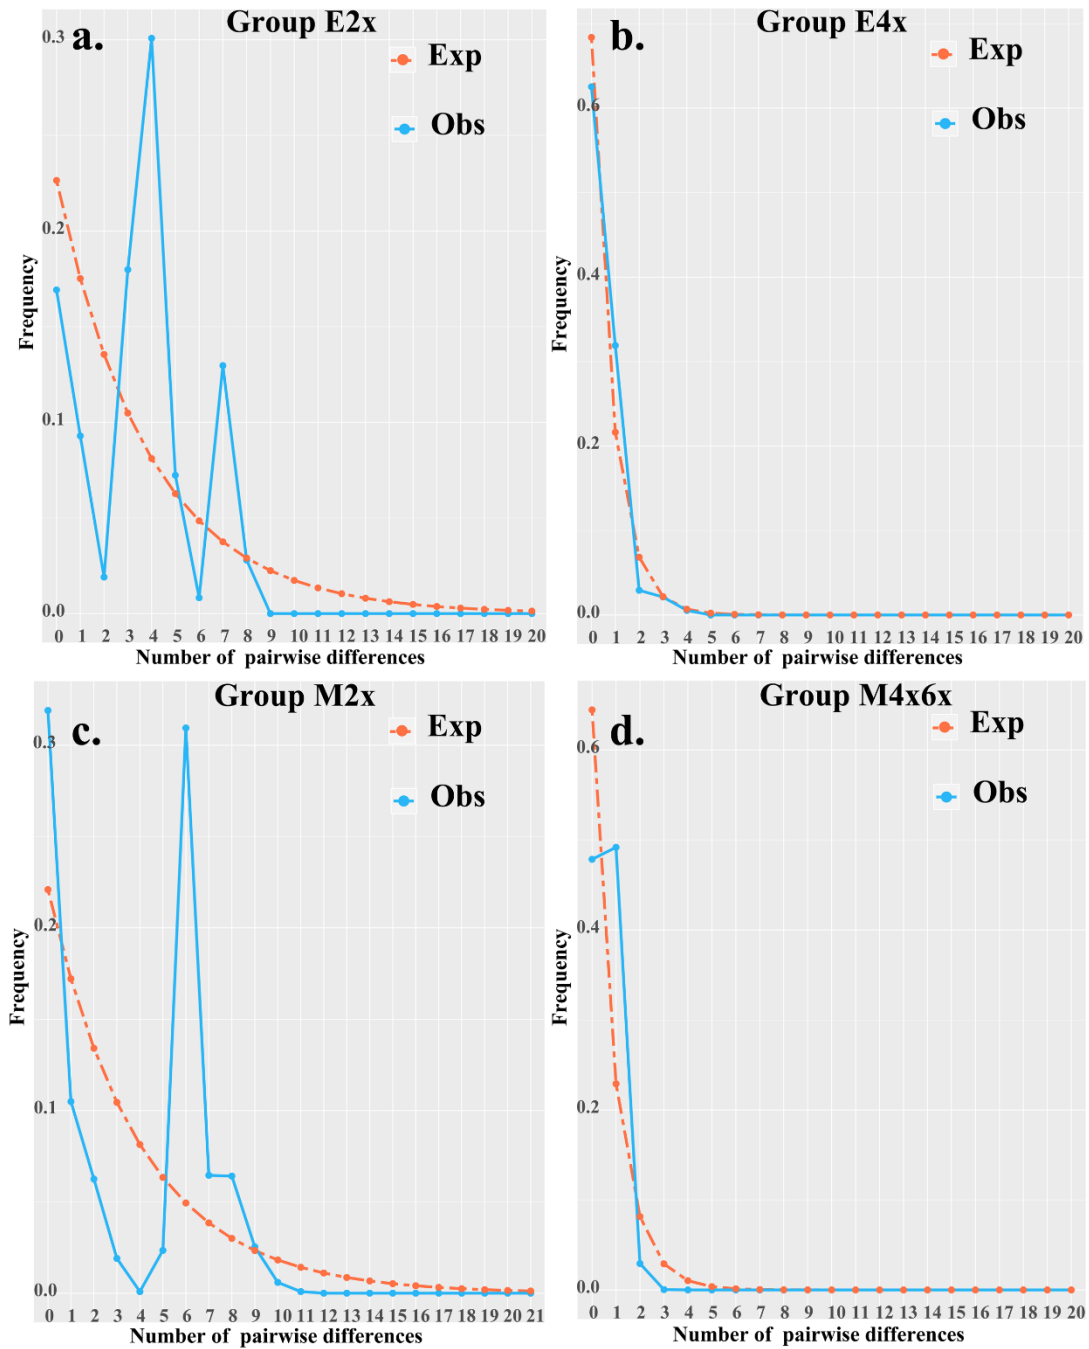

**Figure S3** Observed and expected mismatch distributions for different groups of the *A. chinensis* complex. (a) group E2x; (b) group E4x; (c) group M2x; (d) group M4x6x. The solid line indicates observed distribution; The dashed line represents theoretically expected distribution under a population expansion model.

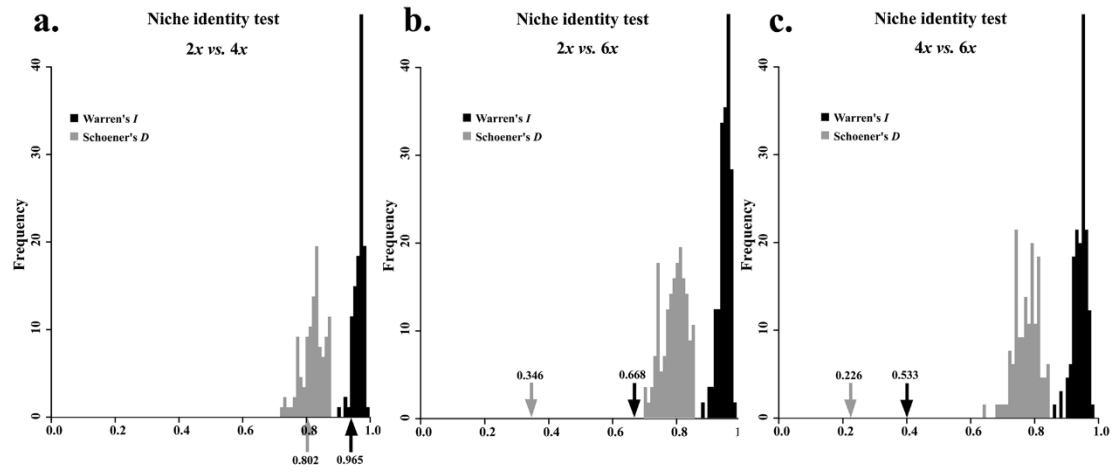

**Figure S4** The results of niche-identity tests by comparing the niches of three main ploidy level populations. (a) 2x vs. 4x (b) 2x vs. 6x (c) 4x vs. 6x
